# Supplementary material
Source: ML conference proceedings conference paper supplement (https://openreview.net/forum?id=UXdOBppwcM)
Supplement: supplementary_material [file supplementarymaterial.pdf › supplementarymaterial/supplementarymaterial.pdf]

---

# THE CONSEQUENCES OF THE INTRINSIC GAP BETWEEN REWARD BELIEFS AND MDP REWARDS

**Anonymous authors**

Paper under double-blind review

## 1 POTENTIAL SOCIETAL IMPACTS

We have discussed the value-alignment problem in Section 5.1. In our work we provide a theoretically analysis on the underlying causes of the vulnerabilities and the alignment problem, and introduce a mathematically rigorous investigation that explains this phenomenon that learning from expert demonstrations comes with a great cost compared to learning from exploring. Our results demonstrate that standard deep reinforcement learning results in learning policies that are more reliable and robust. Our results reveals that despite a significant decrease in performance, the inverse deep neural policy believes that it in fact received larger rewards than it did before which demonstrates that the correlation between predicted rewards and true rewards obtained from the MDP is utterly broken, and there is a clear violation of alignment, i.e. misalignment problem, which reflects there is a gap between what the policy actually did and what the policy itself believed what it did. We believe the alignment problem could have potentially critical overreaching societal impact due to the fact that the alignment of AI systems, e.g. large language models, which interacts with millions of users, are based on and trained with these algorithms. From the AI safety point of view, we believe it is critical to analyze potential foundational effects and the alignment issues that can rise from utilizing these algorithms. The gap between what the policy actually did and what the policy itself believes what it did is a critical issue given the increasing capabilities of AI systems (United Kingdom Parliament, 2024, October); (United Kingdom Parliament, 2023, December); (The White House, 2024, October); (European Union, 2024).

## 2 STATISTICAL MEASURES

### 2.1 PEARSON CORRELATION COEFFICIENT

Let  $\mathcal{R}_{\mathcal{M}}^i$  represent a sample from the distribution of the cumulative rewards obtained from the MDP by the policy and let  $\mathcal{R}_{\text{IQ}}^i$  represent a sample from the distribution of the reward predictions of the inverse  $Q$ -learning algorithm. Thus the Pearson correlation coefficient is,

$$\rho_{\mathcal{R}_{\mathcal{M}}, \mathcal{R}_{\text{IQ}}} = \frac{\text{cov}(\mathcal{R}_{\text{IQ}}, \mathcal{R}_{\mathcal{M}})}{\sigma_{\mathcal{R}_{\mathcal{M}}} \sigma_{\mathcal{R}_{\text{IQ}}}} \quad (1)$$

where  $\sigma_{\mathcal{R}_{\mathcal{M}}}$  represents the standard deviation of the distribution of  $\mathcal{R}_{\mathcal{M}}$  and  $\sigma_{\mathcal{R}_{\text{IQ}}}$  represents the standard deviation of the distribution of  $\mathcal{R}_{\text{IQ}}$ . Note that the covariance of  $\mathcal{R}_{\mathcal{M}}$  and  $\mathcal{R}_{\text{IQ}}$  is

$$\text{cov}(\mathcal{R}_{\text{IQ}}, \mathcal{R}_{\mathcal{M}}) = \mathbb{E}[(\mathcal{R}_{\text{IQ}} - \mu_{\mathcal{R}_{\text{IQ}}})(\mathcal{R}_{\mathcal{M}} - \mu_{\mathcal{R}_{\mathcal{M}}})] \quad (2)$$

where  $\mu_{\mathcal{R}_{\text{IQ}}}$  represents the mean of the distribution of  $\mathcal{R}_{\text{IQ}}$  and  $\mu_{\mathcal{R}_{\mathcal{M}}}$  represents the mean of the distribution of  $\mathcal{R}_{\mathcal{M}}$ .

### 2.2 SPEARMAN CORRELATION COEFFICIENT

Let  $R(\mathcal{R}_{\mathcal{M}})$  represent the rank variables of  $\mathcal{R}_{\mathcal{M}}^i$  and  $R(\mathcal{R}_{\text{IQ}})$  represent the rank variables of  $\mathcal{R}_{\text{IQ}}^i$ . Thus, the Spearman correlation coefficient is defined as

$$\rho_{R(\mathcal{R}_{\mathcal{M}}), R(\mathcal{R}_{\text{IQ}})} = \frac{\text{cov}(R(\mathcal{R}_{\text{IQ}}), R(\mathcal{R}_{\mathcal{M}}))}{\sigma_{R(\mathcal{R}_{\mathcal{M}})} \sigma_{R(\mathcal{R}_{\text{IQ}})}} \quad (3)$$

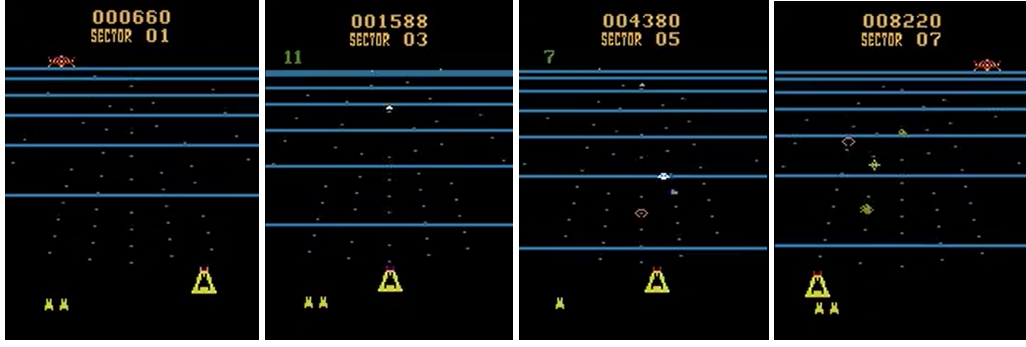

Figure 1: Markov Decision Processes from the Arcade Learning Environment proposed by Bellemare et al. (2013). Rows represents the rollout of the states from an episode in BeamRider.

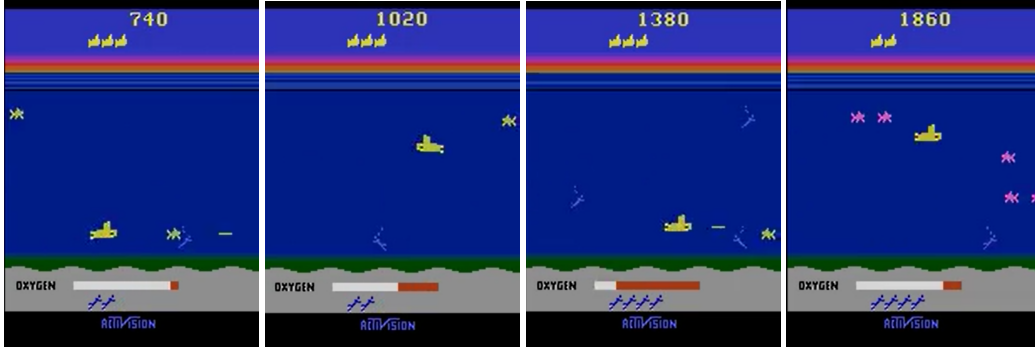

Figure 2: Markov Decision Processes from the Arcade Learning Environment proposed by Bellemare et al. (2013). Rows represent the rollout of the states from an episode in Seaquest.

### 3 ADVERSARIAL DIRECTIONS

Not that for consistency with prior study we used the exact same hyperparameters with Korkmaz (2024); Korkmaz & Brown-Cohen (2023). In this paper, the authors use the ENR technique (Chen et al., 2018) to optimize the adversarial directions.

$$\min_{s_{\text{adv}} \in S} c \cdot J(s_{\text{adv}}) + \lambda_1 \|s_{\text{adv}} - s\|_1 + \lambda_2 \|s_{\text{adv}} - s\|_2^2 \quad (4)$$

As has been explained in Section 4 in Definition 4.1 the algorithm and MDP independent adversarial direction  $\mathcal{A}_{\text{alg}+\mathcal{M}}^{\text{random}}$  computes a direction from a randomly sampled state of a randomly sampled episode of the policy trained with an algorithm **A** in an MDP  $\mathcal{M}$  and introduces this direction to the observation of the policy trained with algorithm **B** in a completely different MDP  $\mathcal{M}'$ .

## 4 ARCHITECTURES, ALGORITHMS, METRICS, ENVIRONMENTS AND HYPERPARAMETER DETAILS

Note that results reported on Pearson correlation coefficient and Spearman correlation coefficient in Section 5.2 in Table 3 are computed as described above.

### 4.1 HYPERPARAMETER DETAILS AND ARCHITECTURES

All of the experiments are conducted in Arcade Learning Environment (ALE) Bellemare et al. (2013) with OpenAI wrappers Brockman et al. (2016). The state-of-the-art imitation learning policies are trained with the inverse  $Q$ -learning algorithm with the exact hyperparameter details provided in the original paper Garg et al. (2021) for Pong and Breakout MDPs. Thus,

- Replay memory size : 200000

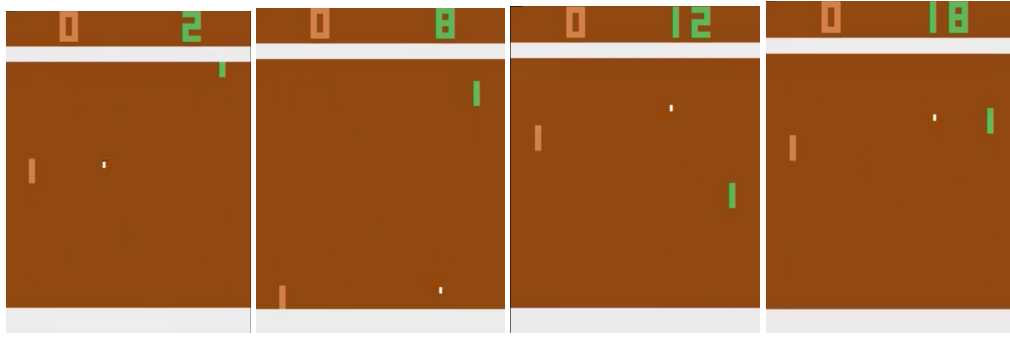

Figure 3: Markov Decision Processes from the Arcade Learning Environment proposed by Bellemare et al. (2013). Rows represent the rollout of the states from an episode in Pong.

- Initial memory : 5000
- Epsilon step :  $1 \times 10^6$
- Epsilon window : 10
- Learning steps :  $1 \times 10^6$
- Critic target update frequency : 1000
- Subsampling frequency : 1
- Batch size : 64
- Demo size : 20
- $\alpha$  : 0.5
- Mix coefficients : 1
- Initial temperature parameter :  $1 \times 10^{-3}$

for Breakout. For Pong the replay memory size is 100000, initial memory is 5000, epsilon step is  $1 \times 10^6$ , epsilon window is 10, learning steps is  $1 \times 10^6$  with evaluation interval  $5 \times 10^3$ , number of seeds 1000, critic target update is 1000 and the batch size is 64 with same demo size, mix coefficients and  $\alpha$ . However, the authors of the inverse  $Q$ -learning paper did not share the hyperparameters for Seaquest. We tuned ourselves and we actually achieved slightly higher results than what was reported in the original paper. For the straightforward vanilla trained deep reinforcement learning policy we use Deep Double Q-Network (DDQN) initially proposed by Hasselt et al. (2016). For completeness we will provide the exact hyperparameters used here too. For yet more details please see Dhariwal et al. (2017).

- Buffer size : 50000
- Learning rate for Adam optimizer :  $5 \times 10^{-5}$
- Value for action probability : 0.02
- Discount factor is 0.99
- Batch size is 32

## 4.2 ENVIRONMENTS

Note that to provide a fair assessment we used the exact same MDPs with the prior study that introduced the inverse  $Q$ -learning algorithm. Figure 1 and Figure 2 show the rollout of states from multiple Markov Decision Process from the Arcade Learning Environment (ALE). All of the MDPs considered have high-dimensional state representations.

## REFERENCES

Marc G Bellemare, Yavar Naddaf, Joel Veness, and Michael. Bowling. The arcade learning environment: An evaluation platform for general agents. *Journal of Artificial Intelligence Research.*, pp. 253–279, 2013.

- 
- Greg Brockman, Vicki Cheung, Ludwig Pettersson, Jonas Schneider, John Schulman, Jie Tang, and Wojciech Zaremba. Openai gym. *arXiv:1606.01540*, 2016.
- Pin-Yu Chen, Yash Sharma, Huan Zhang, Jinfeng Yi, and Cho-Jui Hsieh. EAD: elastic-net attacks to deep neural networks via adversarial examples. In Sheila A. McIlraith and Kilian Q. Weinberger (eds.), *Proceedings of the Thirty-Second AAAI Conference on Artificial Intelligence, (AAAI-18), the 30th innovative Applications of Artificial Intelligence (IAAI-18), and the 8th AAAI Symposium on Educational Advances in Artificial Intelligence (EAAI-18), New Orleans, Louisiana, USA, February 2-7, 2018*, pp. 10–17. AAAI Press, 2018.
- Prafulla Dhariwal, Christopher Hesse, Oleg Klimov, Alex Nichol, Matthias Plappert, Alec Radford, John Schulman, Szymon Sidor, Yuhuai Wu, and Peter Zhokhov. Openai baselines. <https://github.com/openai/baselines>, 2017.
- European Union. The artificial intelligence act. 2024.
- Divyansh Garg, Shuvam Chakraborty, Chris Cundy, Jiaming Song, and Stefano Ermon. Iq-learn: Inverse soft-q learning for imitation. *Neural Information Processing Systems (NeurIPS) [Spotlight Presentation]*, 2021.
- Hado van Hasselt, Arthur Guez, and David Silver. Deep reinforcement learning with double q-learning. In *Thirtieth AAAI conference on artificial intelligence*, 2016.
- Ezgi Korkmaz. Understanding and diagnosing deep reinforcement learning decision making. In *International Conference on Machine Learning, ICML 2024*, 2024.
- Ezgi Korkmaz and Jonah Brown-Cohen. Detecting adversarial directions in deep reinforcement learning to make robust decisions. In *International Conference on Machine Learning, ICML 2023*, 2023.
- The White House. Fact sheet: Omb issues guidance to advance the responsible acquisition of ai in government. 2024, October.
- United Kingdom Parliament. Governance of artificial intelligence (AI). 2023, December.
- United Kingdom Parliament. Artificial intelligence: ethics, governance and regulation. 2024, October.
